# Supplementary figures and images for: The Influence of Diet on Tinnitus Severity: Results of a Large-Scale, Online Survey
Source: MDPI journal article supplement (doi:10.3390/nu14245356), 2022-12-16

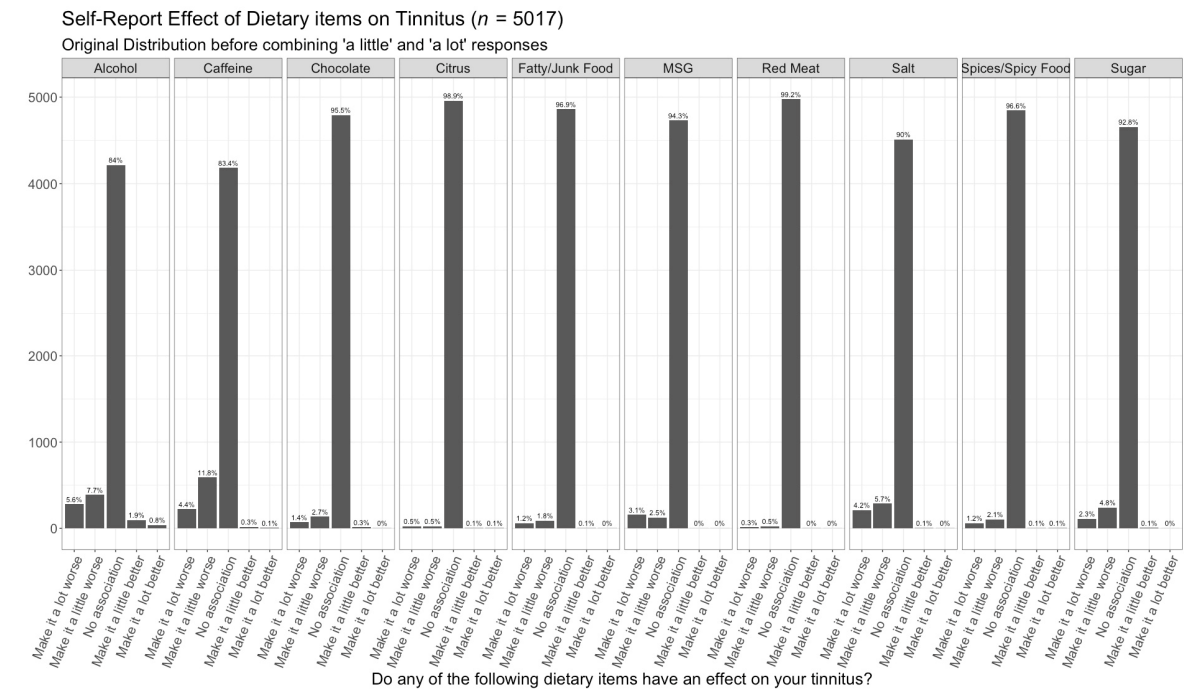

Figure S1: Reported associations of 10 dietary items with tinnitus.

Supplement: s1 [file s1]
